# Supplementary material for: Exploring co-occurrence patterns between organic micropollutants and bacterial community structure in a mixed-use watershed
Source: Royal Society of Chemistry journal article supplement (doi:10.1039/c8em00588e), 2019-01-01
Supplement: c8em00588e1.zip [file c8em00588e1.zip]

**Electronic Supplementary Information**

**Exploring Co-occurrence Patterns between Organic Micropollutants and Bacterial Community Structure in a Mixed-Use Watershed**

Han Gao1, Jeanne M. LaVergne2, Corey M.G. Carpenter3, Raj Desai2, Xu Zhang2, Kimberly Gray1, Damian E. Helbling3, and George F. Wells1

1. Department of Civil and Environmental Engineering, Northwestern University, Evanston, Illinois

2. Master of Science in Biotechnology Program, McCormick School of Engineering, Northwestern University, Evanston, Illinois

3. School of Civil and Environmental Engineering, Cornell University, Ithaca, New York 14853, United States

* Corresponding author: George F. Wells, Department of Civil and Environmental Engineering, Northwestern University, 2145 Sheridan Road, Evanston, IL, 60208, USA, Email: george.wells@northwestern.edu

Submission as a Full Paper to *Environmental Science: Processes & Impacts*

**Supplementary Methods**

**Micropollutants Unsupervised Clustering**

Unsupervised clustering based on k-means was conducted in python scikit-learn. We used three methods to determine the optimal number of clusters prior to apply k-means clustering: (1) average within-cluster distance, (2) percentage of variance explained, and (3) Silhouette score. The elbow method was used to choose the optimal number of clusters based on average within-cluster distance and percentage of variance explained. The “elbow” is the point where a new cluster definition will result in only a marginal change of the within-cluster distance and the increase in percentage of variance explained. The silhouette score was calculated to measure the intra-cluster and inter-cluster distance. The Silhouette coefficient was calculated as follows:

Silhouette coefficients =

Where a is the average intra-cluster distance and b is the average inter-cluster distance. The Silhouette coefficient is between -1 to 1. The Silhouette coefficient is maximized when the optimal number of clusters is reached.

Based on these three methods, we determined that between 7 and 11 micropollutant clusters were optimal to summarize our micropollutant dataset. We then used K-means clustering with each of these numbers of clusters to arrive at a final number of micropollutant clusters. Clustering results were compared, and optimal clustering was chosen based on prior knowledge of degradation products and structure. In particular, based on compound degradation products, the following chemicals should cluster into a single group1:

1) Venlafaxine, O-desethyl venlafaxine and Desvenlafaxine

2) Nicotine and Cotinine

3) Propachlor, Propachlor-ESA and Propachlor-OXA

4) Atrazine, Atrazin-2-hydroxy and Atrazine-desmethyl-deisopropyl

5) Benzotriazole-methyl-1H and Benzotriazole

6) Caffeine, Paraxanthine and Theophylline

7) Atenolol, Metoprolol and Atenolol-acid

8) Sulfamethoxazole and N4-acetyl sulfamethoxazole

And based on structure, the following chemicals were anticipated to cluster into a single group:

1) Estrone, Estriol and Hydrocortisone

2) TCEP and TBP

3) PFOA and PFBA

4) Venlafaxine, O-desmethylvenlafaxine and tramadol

5) Caffeine, Paraxanthine and Theophylline

After inspecting all the rules based on prior knowledge, we determined that 8 clusters best represented the micropollutant dataset in this study.

**Supplementary Tables**

**Table S1.** 126 target micropollutants andreference standard information. Use and structure for each micropollutant can be found in reference 2. Membership in micropollutant groups 0 to 7 was defined in this study based on k-means clustering (see methods and Table S3). LOQ=limit of quantification.

| **Micropollutant** | **CAS number** | **Adduct** | **Exact Mass** | **RT** | **Diagnostic Fragment** | **LOQ** | **Internal Standard Assignment** | **Micropollutant Group Number** |
| --- | --- | --- | --- | --- | --- | --- | --- | --- |
|  |  |  | *(m/z)* | *(min)* | *(m/z)* | *(ng L-1)* |  |  |
| 2,4-D | 94-75-7 | [M-H] | 218.9611 | 8.1 | 160.96 | 5 | Mecoprop-d3 | 6 |
| 2,6-dichlorobenzamide | 2008-58-4 | [M+H] | 189.9826 | 3.4 | 172.96 | 5 | Dimethoate-d3 | 6 |
| 2,6-dimethoxyphenol | 91-10-1 | [M+H] | 155.0708 | 4.7 | 95.05 | 50 | Dimethoate-d3 | 6 |
| 2-ethyl-2-phenyl-malonamide | 7206-76-0 | [M+H] | 207.1134 | 3.4 | 119.09 | 5 | Iopromide-d3 | 1 |
| 2-methylisothiazolin-3-one (MI) | 2682-20-4 | [M+H] | 116.0164 | 1.6 | 100.99 | 1 | 2-methyl-3-isothiazolinone-d3 | 1 |
| Abacavir | 136470-78-5 | [M+H] | 287.162 | 3.4 | 191.1 | 5 | Trimethoprim-d9 | 0 |
| Acebutolol | 37517-30-9 | [M+H] | 337.2122 | 4.4 | 319.2 | 1 | Dimethoate-d3 | 7 |
| Acetaminophen | 103-90-2 | [M+H] | 152.0706 | 2.3 | 110.06 | 5 | Acetaminophen-d4 | 1 |
| Adrenosterone | 382-45-6 | [M+H] | 301.1803 | 6.6 | 257.15 | 1 | Carbofuran-d3 | 0 |
| Albuterol | 18559-94-9 | [M+H] | 240.1599 | 2.2 | 148.08 | 1 | Metoprolol Acid-d5 | 7 |
| Allopurinol | 315-30-0 | [M+H] | 137.0458 | 1.5 | 110.03 | 250 | Allopurinol-d2 | 4 |
| Amitriptyline | 50-48-6 | [M+H] | 278.1908 | 7.8 | 233.13 | 1 | Isoproturon-d6 | 0 |
| Amphetamine | 300-62-9 | [M+H] | 136.1126 | 3.3 | 91.05 | 5 | Venlafaxine-d6 | 1 |
| Atenolol | 29122-68-7 | [M+H] | 267.1703 | 2.3 | 190.09 | 1 | Atenolol-d7 | 7 |
| Atenolol Acid | 56392-14-4 | [M+H] | 268.1549 | 3.3 | 191.07 | 5 | Metoprolol Acid-d5 | 7 |
| Atorvastatin | 134523-00-5 | [M+H] | 559.2608 | 11 | 440.22 | 100 | Ibuprofen-d3 | 0 |
| Atrazine | 1912-24-9 | [M+H] | 216.101 | 7.3 | 174.05 | 1 | Atrazine-d5 | 7 |
| Atrazine-2-hydroxy | 2163-68-0 | [M+H] | 198.1349 | 3.8 | 156.09 | 1 | Atrazine-d5 | 7 |
| Atrazine-desethyl-desisopropyl | 3397-62-4 | [M+H] | 146.0233 | 1.7 | 104 | 25 | Atrazine-d5 | 4 |
| Azoxystrobin | 131860-33-8 | [M+H] | 404.1241 | 8.7 | 372.1 | 1 | Azoxystrobin-d4 | 4 |
| Bentazon | 25057-89-0 | [M-H] | 239.0485 | 6.6 | 175.09 | 5 | Mecoprop-d3 | 0 |
| Benzotriazole-methyl-1H | 136-85-6 | [M+H] | 134.0713 | 5.1 | 106.07 | 1 | Tris-2-chloroethyl-phosphate-d12 | 4 |
| Benzisothiazolin-3-one (BIT) | 2634-33-5 | [M+H] | 152.0164 | 4.4 | 109.01 | 5 | Carbofuran-d3 | 4 |
| Bromacil | 314-40-9 | [M+H] | 261.0233 | 6.1 | 204.96 | 25 | Carbofuran-d3 | 6 |
| Bupropion | 34841-39-9 | [M+H] | 240.1155 | 5.1 | 166.04 | 25 | Citalopram-d6 | 7 |
| Caffeine | 58-08-2 | [M+H] | 195.0876 | 3.4 | 138.07 | 25 | Caffeine-13C3 | 0 |
| Carbamazepine | 298-46-4 | [M+H] | 237.1022 | 6.6 | 194.1 | 1 | Carbamazepine-13C6 | 0 |
| Carbaryl | 63-25-2 | [M+H] | 202.0873 | 6.6 | 145.06 | 1 | Carbaryl-d7 | 1 |
| Carisoprodol | 78-44-4 | [M+H] | 261.1814 | 7.6 | 158.12 | 5 | Isoproturon-d6 | 2 |
| Celecoxib | 169590-42-5 | [M+H] | 382.0837 | 10.9 | 362.08 | 5 | Celecoxib-d4 | 4 |
| Chloridazon | 1698-60-8 | [M+H] | 222.0428 | 4.5 | 128.99 | 1 | Acetaminophen-d4 | 4 |
| Chlorpheniramine | 132-22-9 | [M+H] | 275.1315 | 4.9 | 230.07 | 1 | Venlafaxine-d6 | 6 |
| Cimetidine | 51481-61-9 | [M+H] | 253.1235 | 2.3 | 159.07 | 5 | Cimetidine-d3 | 4 |
| cis-Diltiazem | 42399-41-7 | [M+H] | 415.1691 | 6.4 | 310.17 | 1 | Diltiazem-d4 | 4 |
| Citalopram | 59729-33-8 | [M+H] | 325.1716 | 5.9 | 262.1 | 1 | Citalopram-d6 | 0 |
| Clofibric Acid | 882-09-7 | [M-H] | 213.0313 | 8.9 | 126.99 | 5 | Mecoprop-d3 | 6 |
| Codeine | 76-57-3 | [M+H] | 300.1599 | 2.5 | 215.11 | 1 | Metoprolol Acid-d5 | 0 |
| Cotinine | 486-56-6 | [M+H] | 177.1028 | 1.2 | 146.06 | 1 | Allopurinol-d2 | 1 |
| DEET | 134-62-3 | [M+H] | 192.1383 | 7.3 | 119.05 | 1 | Carbamazepine-13C6 | 1 |
| Desmethylvenlafaxine/Tramadol | 93413-62-8 | [M+H] | 264.1958 | 4.2 | 201.13 | 1 | Venlafaxine-d6 | 6 |
| Dexamethasone | 50-02-2 | [M+H] | 393.2077 | 8 | 237.13 | 5 | Carbofuran-d3 | 0 |
| Dextromethorphan | 125-71-3 | [M+H] | 272.2014 | 5.8 | 147.08 | 1 | Dextromethorphan-d3 | 6 |
| Diclofenac | 15307-86-5 | [M+H] | 296.0239 | 11.5 | 215.05 | 25 | Diclofenac-13C6 | 4 |
| Dimethoate | 60-51-5 | [M+H] | 230.008 | 4.5 | 142.99 | 1 | Dimethoate-d6 | 2 |
| Diphenhydramine | 58-73-1 | [M+H] | 256.1701 | 6 | 167.09 | 1 | Citalopram-d6 | 1 |
| Diuron | 330-54-1 | [M+H] | 233.0243 | 7.9 | 159.97 | 5 | Isoproturon-d6 | 2 |
| Efavirenz | 154598-52-4 | [M+H] | 316.0352 | 11.5 | 244.01 | 25 | Efavirenz-d6 | 6 |
| Estriol | 50-27-1 | [M+Na] | 311.1618 | 5.9 | 226.89 | 25 | Fexofenadine-d6 | 0 |
| Estrone | 53-16-7 | [M+H] | 271.1698 | 5.8 | 157.06 | 25 | Carbofuran-d3 | 0 |
| Ethofumesate | 26225-79-6 | [M+H] | 287.0947 | 8.9 | 161.06 | 5 | Azoxystrobin-d4 | 7 |
| Ethyl butylacetylaminopropionate | 52304-36-6 | [M+H] | 216.1599 | 6.6 | 86.1 | 5 | Carbamazepine-13C6 | 2 |
| Famotidine | 76824-35-6 | [M+H] | 338.0527 | 2.3 | 189.03 | 25 | Cimetidine-d3 | 4 |
| Fexofenadine | 83799-24-0 | [M+H] | 502.2957 | 7.4 | 484.28 | 1 | Fexofenadine-d6 | 0 |
| Fluconazole | 86386-73-4 | [M+H] | 307.1113 | 4.5 | 220.07 | 1 | Dimethoate-d6 | 4 |
| Fluoxetine | 54910-89-3 | [M+H] | 310.1413 | 8.4 | 265.16 | 5 | Fluoxetine-d5 | 6 |
| Gemfibrozil | 25812-30-0 | [M+H] | 251.1641 | 13.5 | 129.09 | 5 | Gemfibrozil-d6 | 2 |
| Hydrocodone | 125-29-1 | [M+H] | 300.1599 | 2.8 | 199.08 | 5 | Morphine-d3 | 0 |
| Hydrocortisone | 50-23-7 | [M+H] | 363.2171 | 7 | 327.19 | 5 | Carbaryl-d7 | 0 |
| Ibuprofen | 15687-27-1 | [M+Na] | 229.1199 | 11.9 | 181.99 | 25 | Ibuprofen-d3 | 6 |
| Imidacloprid | 138261-41-3 | [M+H] | 256.0601 | 4 | 175.1 | 5 | Imidacloprid-d4 | 4 |
| Iodocarb | 55406-53-6 | [M+H] | 281.9985 | 7.4 | 164.92 | 100 | Iodocarb-d9 | 2 |
| Iopromide | 73334-07-3 | [M+H] | 791.877 | 2.5 | 572.9 | 50 | Iopromide-d3 | 5 |
| Ioxynil | 1689-83-4 | [M-H] | 369.8221 | 8.3 | 230.92 | 1 | Sucralose-d6 | 6 |
| Isoproturon | 34123-59-6 | [M+H] | 207.1492 | 7.7 | 134.1 | 1 | Isoproturon-d6 | 7 |
| Ketoprofen | 22071-15-4 | [M+H] | 255.1015 | 8.5 | 209.1 | 1 | Carbofuran-d3 | 0 |
| Lidocaine | 137-58-6 | [M+H] | 235.181 | 3.7 | 86.1 | 1 | Thiabendazole-d4 | 7 |
| Linuron | 330-55-2 | [M+H] | 249.0192 | 8.9 | 159.97 | 5 | Naproxen-methoxy-d3 | 6 |
| Malaoxon | 1634-78-2 | [M+H] | 315.0667 | 6.2 | 255.07 | 100 | Carbamazepine-13C6 | 2 |
| MCPA | 94-74-6 | [M-H] | 199.0157 | 8.5 | 141.01 | 5 | Mecoprop-d3 | 6 |
| Mecoprop | 93-65-2 | [M-H] | 213.0313 | 9.7 | 141.01 | 5 | Mecoprop-d3 | 2 |
| Meprobamate | 57-53-4 | [M+H] | 219.1345 | 5.4 | 203.14 | 5 | Venlafaxine-d6 | 2 |
| Metamitron | 41394-05-2 | [M+H] | 203.0938 | 4.3 | 175.1 | 5 | Imidacloprid-d4 | 1 |
| Metaxalone | 1665-48-1 | [M+H] | 222.1135 | 7.1 | 133.1 | 1 | Atrazine-d5 | 1 |
| Metformin | 657-24-9 | [M+H] | 130.1092 | 1.1 | 86 | 25 | Metformin-d6 | 2 |
| Methadone | 76-99-3 | [M+H] | 310.2171 | 7.5 | 265.16 | 1 | Atrazine-d5 | 1 |
| Methocarbamol | 532-03-6 | [M+H] | 242.1028 | 4.7 | 163.08 | 5 | Dimethoate-d6 | 1 |
| Methomyl | 16752-77-5 | [M+H] | 163.0541 | 3.2 | 102.97 | 5 | Thiabendazole-d4 | 7 |
| Metolachlor | 51218-45-2 | [M+H] | 284.1412 | 10.5 | 252.12 | 1 | Naproxen-methoxy-d3 | 2 |
| Metoprolol | 37350-58-6 | [M+H] | 268.1907 | 4.4 | 159.08 | 1 | Dimethoate-d6 | 2 |
| Metribuzin | 21087-64-9 | [M+H] | 215.0961 | 6 | 187.1 | 1 | Carbamazepine-13C6 | 2 |
| Molinate | 2212-67-1 | [M+H] | 188.1109 | 9.5 | 126.09 | 5 | Azoxystrobin-d4 | 2 |
| Morphine | 57-27-2 | [M+H] | 286.1437 | 1.6 | 201.09 | 5 | Morphine-d3 | 0 |
| Nadolol | 42200-33-9 | [M+H] | 310.2013 | 3.6 | 254.14 | 1 | Thiabendazole-d4 | 7 |
| Naproxen | 22204-53-1 | [M+H] | 231.1015 | 8.9 | 185.1 | 1 | Naproxen-methoxy-d3 | 6 |
| Nicotine | 54-11-5 | [M+H] | 163.1235 | 1.1 | 102.97 | 5 | Metformin-d6 | 0 |
| Oxcarbazepine | 28721-07-5 | [M+H] | 253.0977 | 5.7 | 208.07 | 1 | Carbamazepine-13C6 | 0 |
| Oxybenzone | 131-57-7 | [M+H] | 229.0864 | 10.9 | 151.04 | 1 | Oxybenzone-d3 | 4 |
| Paraxanthine/Theophylline | 611-59-6 | [M+H] | 181.0726 | 2.8 | 124.05 | 5 | Caffeine-13C3 | 0 |
| Penciclovir | 39809-25-1 | [M+H] | 254.1248 | 1.3 | 152.06 | 25 | Allopurinol-d2 | 0 |
| Pentoxyfylline | 5/6/6493 | [M+H] | 279.1457 | 4.7 | 181.07 | 1 | Carbofuran-d3 | 0 |
| Perfluorobutanoic Acid | 375-22-4 | [M-H] | 212.9792 | 4.5 | 168.99 | 100 | Sucralose-d6 | 3 |
| Perfluorooctanoic Acid | 335-67-1 | [M-H] | 412.9665 | 12 | 218.99 | 25 | Sucralose-d6 | 3 |
| Phenobarbital | 50-06-6 | [M-H] | 231.077 | 5.3 | 188.07 | 25 | Sucralose-d6 | 1 |
| Phenytoin | 57-41-0 | [M+H] | 253.0977 | 6.5 | 182.1 | 5 | Carbofuran-d3 | 1 |
| Pirimicarb | 23103-98-2 | [M+H] | 239.1508 | 4.1 | 182.13 | 1 | Pirimicarb-d6 | 7 |
| Primidone | 125-33-7 | [M+H] | 219.1128 | 4.6 | 162.09 | 5 | Pirimicarb-d6 | 1 |
| Progesterone | 57-83-0 | [M+H] | 315.2324 | 11.6 | 297.22 | 5 | Azoxystrobin-d4 | 0 |
| Prometon | 1610-18-0 | [M+H] | 226.1662 | 5.8 | 184.12 | 1 | Carbaryl-d7 | 7 |
| Propachlor | 1918-16-7 | [M+H] | 212.0836 | 7.5 | 170.04 | 1 | Isoproturon-d6 | 1 |
| Propachlor-ESA | 123732-85-4 | [M-H] | 256.0638 | 4.7 | 162.02 | 5 | Sucralose-d6 | 1 |
| Propachlor-OXA | 70628-36-3 | [M+H] | 208.0968 | 4.8 | 120.04 | 5 | Carbofuran-d3 | 1 |
| Propranolol | 525-66-6 | [M+H] | 260.1651 | 5.9 | 183.08 | 1 | Dextromethorphan-d3 | 1 |
| Propyzamide | 23950-58-5 | [M+H] | 256.0296 | 9.6 | 172.96 | 1 | Isoproturon-d6 | 7 |
| Pseudoephedrine | 299-42-3 | [M+H] | 166.1229 | 2.8 | 133.09 | 1 | Iopromide-d3 | 1 |
| Ranitidine | 66357-35-5 | [M+H] | 315.1485 | 2.2 | 176.05 | 5 | Ranitidine-d6 | 4 |
| Sertraline | 79617-96-2 | [M+H] | 306.0816 | 8.9 | 275.04 | 25 | Sertraline-d3 | 6 |
| Siduron | 1982-49-6 | [M+H] | 233.1654 | 8.9 | 137.07 | 5 | Naproxen-methoxy-d3 | 5 |
| Simazine | 122-34-9 | [M+H] | 202.0854 | 6 | 132.03 | 1 | Atrazine-d5 | 4 |
| Sitagliptin | 486460-32-6 | [M+H] | 408.1259 | 4.6 | 235.08 | 5 | Dimethoate-d6 | 3 |
| Sucralose | 56038-13-2 | [M+FA-H] | 447.0499 | 3.9 | 278.15 | 5 | Sucralose-d6 | 5 |
| Sulfadimethoxine | 122-11-2 | [M+H] | 311.0808 | 4.9 | 237.04 | 1 | Sulfadimethoxine-d6 | 4 |
| Sulfamethoxazole | 723-46-6 | [M+H] | 254.0594 | 3.9 | 156.01 | 1 | Sulfamethoxazole-phenyl-13C6 | 1 |
| Sulfathiazole | 72-14-0 | [M+H] | 256.0209 | 2.6 | 156.01 | 25 | Sulfadimethoxine-d6 | 4 |
| Terbutylazine | 5915-41-3 | [M+H] | 230.1167 | 8.9 | 174.05 | 1 | Naproxen-methoxy-d3 | 4 |
| Testosterone | 58-22-0 | [M+H] | 289.2168 | 9.6 | 253.2 | 1 | Azoxystrobin-d4 | 0 |
| Thiabendazole | 148-79-8 | [M+H] | 202.0433 | 3.5 | 175.03 | 1 | Thiabendazole-d4 | 4 |
| Triamterene | 396-01-0 | [M+H] | 254.1154 | 4 | 237.09 | 1 | Thiabendazole-d4 | 4 |
| Tributyl-phosphate | 126-73-8 | [M+H] | 267.1725 | 13.1 | 155.05 | 25 | Ibuprofen-d3 | 5 |
| Triclosan | 3380-34-5 | [M-H] | 286.9428 | 13.5 | 165.89 | 50 | Triclosan-d3 | 6 |
| Trimethoprim | 738-70-5 | [M+H] | 291.1451 | 3.4 | 245.1 | 1 | Trimethoprim-d9 | 6 |
| Trinexapac-ethyl | 95266-40-3 | [M+H] | 253.107 | 7.9 | 183.03 | 1 | Isoproturon-d6 | 1 |
| Tris(2-chloroethyl)phosphate | 115-96-8 | [M+H] | 284.9617 | 6.3 | 160.98 | 5 | Tris-2-chloroethyl-phosphate-d12 | 5 |
| Valsartan | 137862-53-4 | [M+H] | 436.2348 | 9.7 | 235.1 | 1 | Isoproturon-d6 | 1 |
| Venlafaxine | 93413-69-5 | [M+H] | 278.2114 | 5.5 | 121.06 | 1 | Venlafaxine-d6 | 6 |
| Verapamil | 52-53-9 | [M+H] | 455.291 | 6.4 | 303.21 | 1 | Diltiazem-d4 | 5 |
| Warfarin | 2610-86-8 | [M+H] | 309.1121 | 9.5 | 251.07 | 1 | Azoxystrobin-d4 | 0 |

**Table S2.** Isotope-labeled internal reference standard (ILIS) information2

| **Micropollutant** | **CAS number** | **Supplier** | **Adduct** | **Exact Mass** | **RT** |
| --- | --- | --- | --- | --- | --- |
|  |  |  |  | (m/z) | (min) |
| 2-methyl-3-isothiazolinone-d3 | 1329509-49-0 | TRC | [M+H] | 119.0353 | 1.5 |
| Acetaminophen-d4 | 64315-36-2 | Sigma Aldrich | [M+H] | 156.0963 | 2.3 |
| Allopurinol-d2 | 916979-34-5 | TRC | [M+H] | 139.0583 | 1.5 |
| Atenolol-d7 | 1202864-50-3 | Sigma Aldrich | [M+H] | 274.2148 | 2.1 |
| Atrazine-d5 | 163165-75-1 | Sigma Aldrich | [M+H] | 221.1330 | 7.2 |
| Azoxystrobin-d4 | 1346606-39-0 | TRC | [M+H] | 408.1492 | 8.7 |
| Caffeine-13C3 | n/a | Sigma Aldrich | [M+H] | 198.0977 | 3.4 |
| Carbamazepine-13C6 | n/a | Sigma Aldrich | [M+H] | 243.1224 | 6.7 |
| Carbaryl-d7 | 362049-56-7 | TRC | [M+H] | 209.1302 | 6.5 |
| Carbofuran-d3 | 1007459-98-4 | Sigma Aldrich | [M+H] | 225.1313 | 6.1 |
| Celecoxib-d4 | 544686-20-6 | TRC | [M+H] | 386.1083 | 10.9 |
| Cimetidine-d3 | 1185237-29-9 | TRC | [M+H] | 256.1418 | 2.3 |
| Citalopram-d6 | 1246819-94-2 | TRC | [M+H] | 331.2087 | 5.7 |
| Dextromethorphan-d3 | 524713-56-2 | TRC | [M+H] | 275.2197 | 5.7 |
| Diclofenac-13C6 | 1261393-73-0 | Sigma Aldrich | [M+H] | 302.0441 | 11.5 |
| Diltiazem-d4 | 1217769-52-2 | TRC | [M+H] | 419.1937 | 6.2 |
| Dimethoate-d6 | 1219794-81-6 | TRC | [M+H] | 236.0446 | 4.5 |
| Erythromycin-13C-d3 | 959119-26-7 | TRC | [M+H] | 738.4907 | 7.1 |
| Fexofenadine-d6 | 548783-71-7 | TRC | [M+H] | 508.3328 | 7.1 |
| Fluoxetine-d5 | 1173020-43-3 | Sigma Aldrich | [M+H] | 315.1727 | 8.1 |
| Gembifrozil-d6 | n/a | TRC | [M+H] | 257.2024 | 13.4 |
| Ibuprofen-d3 | 121662-14-4 | Sigma Aldrich | [M+Na] | 232.1387 | 11.9 |
| Imidacloprid-d4 | 1015855-75-0 | Sigma Aldrich | [M+H] | 260.0852 | 4.0 |
| Iodocarb-d9 | 1246815-08-6 | TRC | [M+H] | 291.0550 | 7.3 |
| Iopromide-d3 | 1189947-73-6 | TRC | [M+H] | 794.8959 | 2.5 |
| Isoproturon-d6 | 217487-17-7 | Sigma Aldrich | [M+H] | 213.1869 | 7.6 |
| Mecoprop-d3 | 352431-15-3 | TRC | [M-H] | 216.0501 | 9.7 |
| Metformin-d6 | 1185166-01-1 | TRC | [M+H] | 136.1464 | 1.1 |
| Metoprolol Acid-d5 | 1215404-47-9 | TRC | [M+H] | 273.1863 | 3.2 |
| Morphine-d3 | 118357-24-7 | Sigma Aldrich | [M+H] | 289.1626 | 1.6 |
| Naproxen-methoxy-d3 | 958293-79-3 | Sigma Aldrich | [M+H] | 234.1204 | 8.9 |
| Oxybenzone-d3 | n/a | TRC | [M+H] | 232.1053 | 10.8 |
| Pirimicarb-d6 | 1015854-66-6 | Sigma Aldrich | [M+H] | 245.1885 | 4.1 |
| rac-Efavirenz-d4 | 1246812-58-7 | TRC | [M+H] | 320.0598 | 11.5 |
| Ranitidine-d6 | 1185238-09-8 | TRC | [M+H] | 321.1862 | 2.1 |
| Sertraline-d3 | 79559-97-0 | TRC | [M+H] | 309.0999 | 8.6 |
| Sucralose-d6 | n/a | TRC | [M+FA-H] | 447.0499 | 3.9 |
| Sulfadimethoxine-d6 | 73068-02-7 | Sigma Aldrich | [M+H] | 317.1185 | 4.9 |
| Sulfamethoxazole-phenyl-13C6 | 1196157-90-0 | Sigma Aldrich | [M+H] | 260.0795 | 3.9 |
| Thiabendazole-d4 | 1190007-20-5 | TRC | [M+H] | 206.0685 | 3.4 |
| Triclosan-d3 | 1020719-98-5 | TRC | [M-H] | 289.9616 | 13.5 |
| Trimethoprim-d9 | 1189460-62-5 | Sigma Aldrich | [M+H] | 300.2016 | 3.2 |
| Tris-2-chloroethyl-phosphate-d12 | 1276500-47-0 | TRC | [M+H] | 297.0365 | 6.3 |
| Venlafaxine-d6 | 1062606-12-5 | Sigma Aldrich | [M+H] | 284.2491 | 5.3 |

| **Rule** | **Description** | **Enzyme** | **Bacterial genera with strains known to harbor enzymes for biotransformation pathway** |
| --- | --- | --- | --- |
| bt0001 | primary alcohol 🡪 aldehyde | benzyl alcohol dehydrogenase | *Hydrogenophaga*  *Polynucleobacter*  *Comamonas*  *Ralstonia*  *Runella*  *Methylocaldum*  *Methylotenera*  *Rheinheimera* |
| citronellol dehydrogenase |
| geraniol dehydrogenase |
| methanol dehydrogenase |
| NADP-dependent alcohol dehydrogenase |
| p-cumic alcohol dehydrogenase |
| pyridoxine 4-dehydrogenase |
| pyridoxine 4-oxidase |
| vanillyl alcohol oxidase |
| bt0014 | 1-Hydroxy-2-unsubstituted aromatic 🡪 1,2-Dihydroxyaromatic | 2-hydroxybiphenyl 3-monooxygenase | *Hydrogenophaga*  *Polynucleobacter*  *Comamonas*  *Ralstonia*  *Runella* |
| 3-HSA hydroxylase |
| 4-hydroxybenzoate 3-monooxygenase |
| 4-hydroxyphenlyacetate 3-monooxygenase |
| 4-hydroxyphenylacetate 3-hydroxylase |
| 4-Hydroxypyridine derivative 🡪 3,4-Dihydroxypyridine derivative | m-hydroxybenzoate 4-hydroxylase |
| phenol 2-monooxygenase |
| toluene 2-monooxygenase |
| toluene 3-monooxygenase |
| bt0023 | dialiphatic Ether 🡪 Alcohol + Aldehyde | ammonia monooxygenase | *Hydrogenophaga*  *Comamonas*  *Ralstonia*  *Methylocaldum* |
| aromatic-aliphatic Ether 🡪 Phenol derivative + Aldehyde |
| bt0027 | primary Amide 🡪 Carboxylate | amidase | *Hydrogenophaga*  *Polynucleobacter*  *Comamonas*  *Ralstonia*  *Runella*  *Methylocaldum*  *Rheinheimera* |
| bt0044 | Enol 🡪 Keto | 2-hydroxyhexa-2,4-dienoate hydratase | *Comamonas* |
| tautomerase |
| bt0063 | primary Amine 🡪 Aldehyde or Ketone | aromatic aminotransferase | *Hydrogenophaga*  *Polynucleobacter*  *Comamonas*  *Ralstonia*  *Runella*  *Methylotenera*  *Rheinheimera* |
| cyclohexylamine oxidase |
| dimethylamine dehydrogenase |
| heteroxanthine demethylase |
| methylamine dehydrogenase |
| Nicotine dehydrogenase |
| secondary Amine 🡪 Amine + Aldehyde or Ketone | nitrilotriacetate monooxygenase |
| tertiary Amine 🡪 secondary Amine + Aldehyde or Ketone | nitrilotriacetate dehydrogenasee |
| Methylammonium derivative 🡪 Trimethylamine + Aldehyde or Ketone | nitrilotriacetate monooxygenase |
| trimethylamine dehydrogenase |
| trimethylamine dehydrogenase |
| trimethylamine-N-oxide demethylase |
| tropine dehydrogenase |
| bt0330 | 1-halo or 1-pseudohalo-s-Triazine 🡪 1-hydroxy-s-Triazine | atrazine chlorohydrolase | *Comamonas*  *Ralstonia*  *Methylocaldum*  *Methylotenera* |
| n-isopropylammelide isopropylaminohydrolase |
| bt0353 | mono-carbon-substituted Benzenoid 🡪 1-substituted-2,3-dihydroxy Benzenoid | aromatic hydrocarbon dioxygenase | *Comamonas*  *Ralstonia* |
| mono-halo-substituted Benzenoid 🡪 1-halo-2,3-dihydroxy Benzenoid |
| mono-pseudohalo-substituted Benzenoid 🡪 1-pseudohalo-2,3-dihydroxy Benzenoid |

**Table S3.** List of all aerobic biotransformation rules predicted with high likelihood for 126 measured micropollutants in this study in the EAWAG-BBD, and bacterial genera with strains known to harbor enzymes for each biotransformation rule.

**Table S4:** a. Number of substructure within each micropollutant. Substructures were further classified into “highly likely to be biodegraded under aerobic conditions”, “likely to be degraded under aerobic conditions”, and “no reported aerobic biodegradation” based on the EAWAG-BBD1; b. Average number of each substructures within each micropollutant cluster.

**Table S5: Summary of micropollutant clusters based on unsupervised clustering by functional group.**  The average number of representative substructures (average number greater than 1 in at least one micropollutant cluster) within each cluster is shown. Micropollutants assigned to each group are summarized in Table S1. Diagnostic substructures for each cluster are highlighted in purple. The highlighted substructures are characteristic of the associated micropollutant clusters.

| Micropollutant Cluster Number | **Ring structure** | | **aerobically highly likely biodegraded** | | **aerobically likely biodegraded** | | | **no reported aerobic biodegradation** | | | | |
| --- | --- | --- | --- | --- | --- | --- | --- | --- | --- | --- | --- | --- |
|  | rings | aromatic | amine | hydroxyl | ether | aliphatic | methyl | amine | aliphatic | halogen | methyl |
| 0 | 3.3 | 2.6 | 0.9 | 0.4 | 0.2 | 0.0 | 0.1 | 0.0 | 0.2 | 0.0 | 1.0 |
| 1 | 1.5 | 1.3 | 0.2 | 0.0 | 0.1 | 0.0 | 0.3 | 0.2 | 1.4 | 0.0 | 0.2 |
| 2 | 0.6 | 0.5 | 0.0 | 0.0 | 0.5 | 0.2 | 1.5 | 0.0 | 0.4 | 0.2 | 0.1 |
| 3 | 1.0 | 0.7 | 1.3 | 0.0 | 0.0 | 0.0 | 0.0 | 0.0 | 0.0 | 9.3 | 0.0 |
| 4 | 2.0 | 1.9 | 0.0 | 0.0 | 0.1 | 0.2 | 0.0 | 2.0 | 0.0 | 0.4 | 0.0 |
| 5 | 1.3 | 0.7 | 0.3 | 1.3 | 1.7 | 2.4 | 0.0 | 0.0 | 0.0 | 0.4 | 0.0 |
| 6 | 1.7 | 1.3 | 0.4 | 0.1 | 0.6 | 0.9 | 0.2 | 0.0 | 0.1 | 1.3 | 0.0 |
| 7 | 1.1 | 0.9 | 1.0 | 0.2 | 0.3 | 0.2 | 0.0 | 0.0 | 0.4 | 0.2 | 2.9 |

**Supplementary figures**

**Figure S1**. Principle Component Analysis (PCA) plot summarizing variance in micropollutants between sampling locations and dates using (a) a z-score normalized concentration matrix and (b) a binary occurrence (presence/absence) matrix with top 15 loadings for PC1 and PC2 labelled by each sampling date (by color) and locational group (by shape). The bar plot on the right top corner illustrates the percentage of variance explained for each principle component.


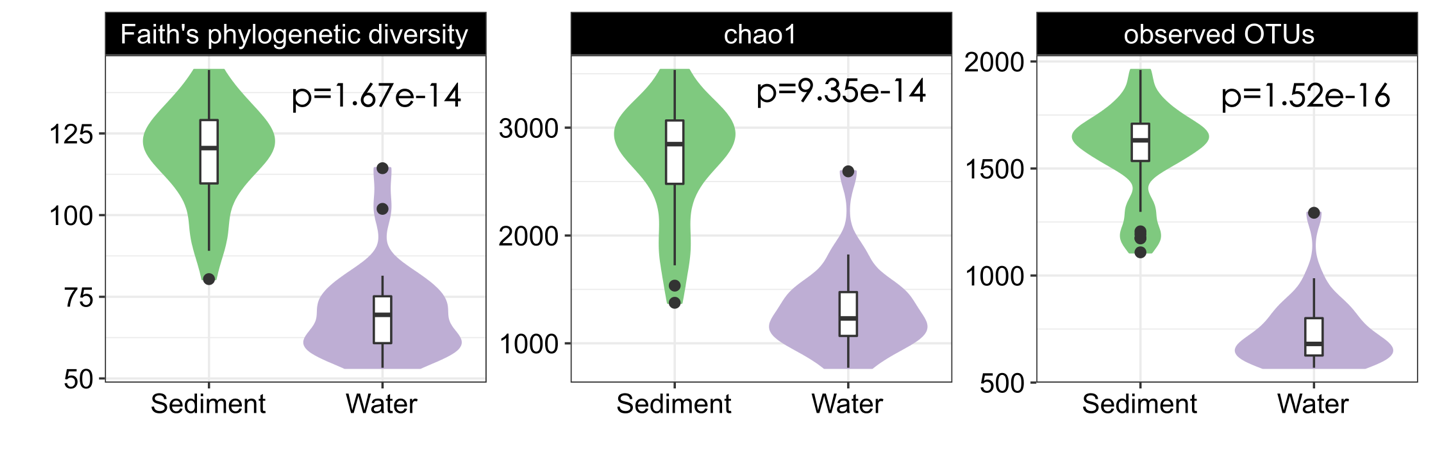


**Figure S2:** Violin and box plots of the bacterial community alpha diversity (Faith’s Phylogenetic Diversity, chao1 and number of observed OTUs [97% identity level]) for sediment and water samples. P-values for Student’s t-test to compare alpha diversity between sediment and water samples are shown in the figure.


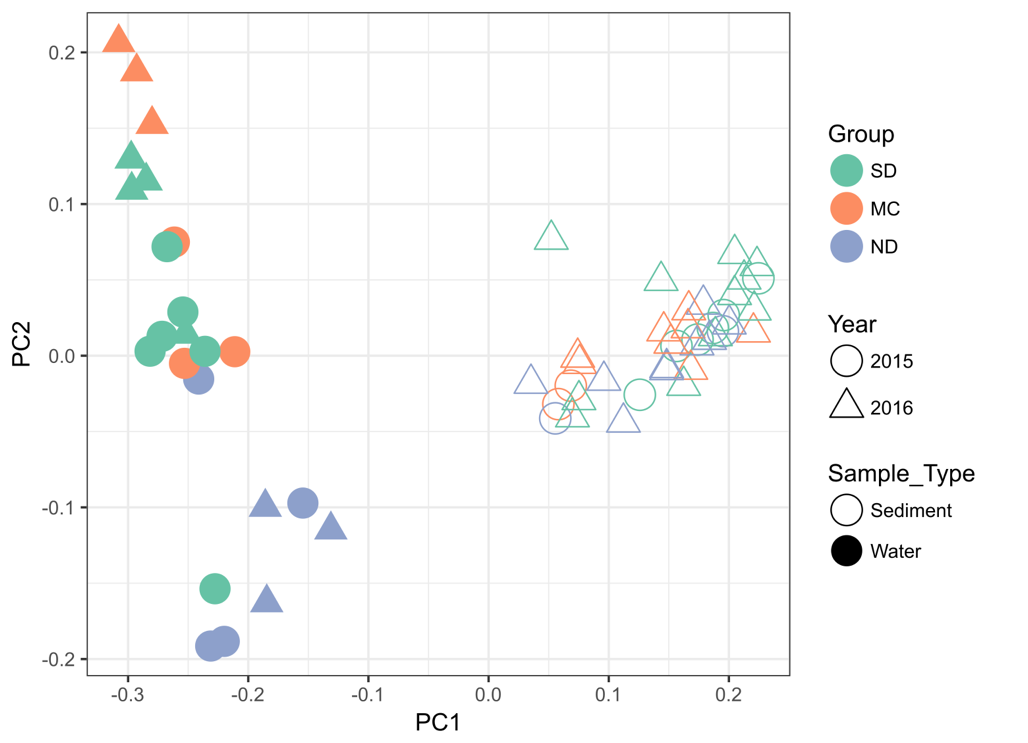


**Figure S3**. Principal coordinate analysis (PCoA) based on weighted Unifrac distances between all sediment (open dot) and water samples (solid dot). Colors represent different sampling locations and shapes indicate sampling year.

**Figure S4a**. Identity and concentration of micropollutants in micropollutant groups 0-7, as defined by unsupervised k-means clustering. Micropollutant groups (0-7) are defined on the righthand side of the figure, and micropollutants are shown on the lefthand side. Sample location and date are shown on the x-axis and colored by different sampling dates. The cumulative concentrations for each micropollutant group are illustrated at the bottom of each group (labelled as MP-0 to MP-7).

**Figure S4b.** The percentage of contribution for each micropollutant to the cumulative micropollutant concentration in each micropollutant cluster. Micropollutants are listed on the lefthand side of the plot, and micropollutant clusters are shown on the righthand side. Sampling location and date is shown on the x-axis.

**Figure S5a**. Network analysis between micropollutant groups and OTUs (persistent or intermittent OTUs), and between OTUs in the DPR water microbiome. Micropollutant groups are labelled “MP” with group number, and nodes for micropollutant groups are colored purple. The other node colors represent the top 5 phyla most strongly correlated with the representative micropollutants; OTUs affiliated with all the other phyla were labelled in grey. The OTU taxonomic classification at the phylum level is based on the Greengenes reference database. Persistent OTUs are indicated by open circles while intermittent OTUs were indicated by solid circles. Colored edges represent strong positive (green, p<0.05, ρ>0.8) or negative (red, p<0.05, ρ<-0.8) correlations between micropollutant groups and OTUs.

**Figure S5b**. Network analysis between micropollutant groups and OTUs (persistent or intermittent OTUs), and between OTUs in the sediment microbiome. Micropollutant groups are labelled in purple in the figure. The other node colors represent OTUs affiliated with the top 5 phyla strongly correlated with the representative micropollutants; all the other phyla were labelled in grey. The taxonomic classification in phylum level was based on Greengenes reference database. Persistent OTUs are illustrated by open circles while intermittent OTUs are indicated by solid circles. Colored edges represent strong positive (green, p<0.05, ρ>0.8) or negative (red, p<0.05, ρ<-0.8) between micropollutant groups and OTU.

**References**

1. Gao, J.; Ellis, L. B.; Wackett, L. P., The University of Minnesota Biocatalysis/Biodegradation Database: improving public access. *Nucleic Acids Res* **2010,** *38*, (Database issue), D488-91.

2. Carpenter, C. M. G.; Helbling, D. E., Widespread Micropollutant Monitoring in the Hudson River Estuary Reveals Spatiotemporal Micropollutant Clusters and Their Sources. *Environ. Sci. Technol.* **2018,** *52*, (11), 6187-6196.
